# Supplementary material
Source: PubMed Central journal article supplement (PMC4832052)
Supplement: supp_kwv268_kwv268supp.pdf [file supp_kwv268_kwv268supp.pdf]

**Web Figure 1.** Mean percentage of energy from total, animal and vegetable protein across 4-yr FFQ cycles in the Nurses' Health Study (1984–2006), Nurses' Health Study II (1991–2007), and the Health Professionals Follow-up Study (1986–2006)

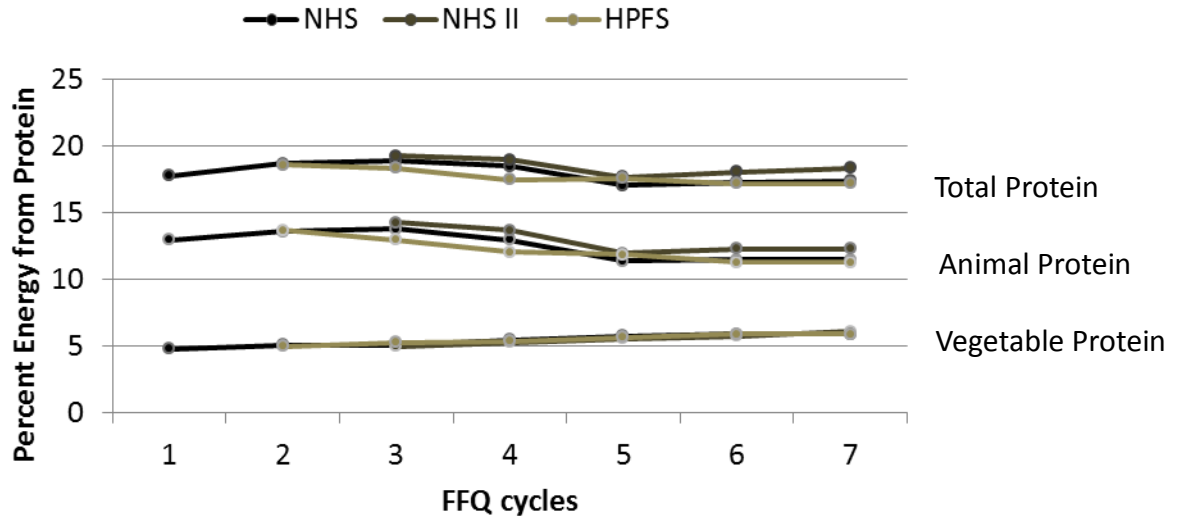

**Web Table 1.** Major food sources of animal and vegetable protein

| <b>Animal Protein Sources</b> | <b>Vegetable Protein Sources</b> |
|-------------------------------|----------------------------------|
| Red meat                      | Whole grains                     |
| Poultry                       | Nuts and nut butters             |
| Processed meat                | Seeds                            |
| Fish and seafood              | Beans and peas                   |
| Eggs                          | Tofu and soy products            |
| Dairy products                | Leafy greens                     |

Based on: Agricultural Research Service, US Department of Agriculture. *USDA National Nutrient Database for Standard Reference, Release 27*. Washington, DC: US Department of Agriculture; 2014.

**Web Table 2.** Age-adjusted characteristics according to baseline animal protein intake among 72,992 women in the Nurses' Health Study, 92,088 women in Nurses' Health Study II, and 40,722 men in the Health Professionals Follow-up Study

|                                            | NHS (1984) |       |       | NHS II (1991) |       |       | HPFS (1986) |       |       |
|--------------------------------------------|------------|-------|-------|---------------|-------|-------|-------------|-------|-------|
|                                            | Q1         | Q3    | Q5    | Q1            | Q3    | Q5    | Q1          | Q3    | Q5    |
| Median intake (% energy/d)                 | 9.7        | 12.9  | 16.8  | 9.9           | 13.5  | 17.6  | 9.4         | 12.8  | 17.0  |
| No.                                        | 14597      | 14598 | 14599 | 18417         | 18418 | 18417 | 7920        | 7921  | 7921  |
| Age (y)                                    | 50.3       | 50.0  | 50.6  | 36.1          | 36.0  | 36.2  | 52.9        | 52.9  | 53.0  |
| White race/ethnicity (%)                   | 97.5       | 98.1  | 97.6  | 95.8          | 96.8  | 96.0  | 94.4        | 95.8  | 94.4  |
| BMI (weight (kg)/height (m) <sup>2</sup> ) | 24.2       | 24.9  | 25.8  | 23.6          | 24.5  | 25.6  | 24.9        | 25.5  | 26.0  |
| BMI >25 (%)                                | 30.4       | 36.5  | 45.0  | 25.8          | 33.3  | 42.2  | 44.6        | 53.3  | 60.1  |
| Physical activity (MET-hr/wk)              | 13.6       | 14.0  | 15.2  | 22.3          | 19.9  | 21.3  | 22.9        | 21.2  | 20.3  |
| Current smoker (%)                         | 26.4       | 23.6  | 23.9  | 12.9          | 11.5  | 12.4  | 10.0        | 9.7   | 9.6   |
| Hypertension (%)                           | 7.7        | 7.6   | 8.8   | 5.4           | 5.9   | 7.3   | 17.5        | 18.7  | 21.4  |
| High cholesterol (%)                       | 3.4        | 3.4   | 3.8   | 13.6          | 14.3  | 16.0  | 9.8         | 10.0  | 11.2  |
| Family history of diabetes (%)             | 27.2       | 28.0  | 30.9  | 32.0          | 34.4  | 36.2  | 17.1        | 18.6  | 19.4  |
| PMH use (%)                                | 23.5       | 24.8  | 26.2  | 4.3           | 4.4   | 4.8   | -           | -     | -     |
| OC use (%)                                 | -          | -     | -     | 11.8          | 10.5  | 10.3  | -           | -     | -     |
| Multivitamin use (%)                       | 35.2       | 36.7  | 40.0  | 44.2          | 43.7  | 43.8  | 42.2        | 41.4  | 42.8  |
| Alcohol (g)                                | 8.5        | 7.3   | 4.9   | 3.8           | 3.2   | 2.3   | 14.6        | 11.6  | 7.7   |
| Total energy (kcal)                        | 1859       | 1781  | 1562  | 1870          | 1823  | 1631  | 2046        | 1991  | 1786  |
| Carbohydrate (% energy)                    | 52.3       | 46.4  | 40.8  | 56.5          | 49.5  | 43.8  | 52.6        | 46.8  | 41.4  |
| Total fat (% energy)                       | 32.7       | 34.9  | 35.8  | 29.7          | 32.0  | 32.3  | 30.0        | 32.4  | 33.5  |
| Saturated fat (% energy)                   | 11.4       | 12.6  | 13.2  | 10.3          | 11.4  | 11.7  | 9.9         | 11.2  | 11.7  |
| Monounsaturated fat (% energy)             | 11.9       | 12.8  | 13.1  | 11.4          | 12.2  | 12.0  | 11.6        | 12.4  | 12.6  |
| Polyunsaturated fat (% energy)             | 6.9        | 6.6   | 6.3   | 5.6           | 5.7   | 5.6   | 6.1         | 5.9   | 5.9   |
| <i>Trans</i> - fat (% energy)              | 2.0        | 2.0   | 1.7   | 1.7           | 1.7   | 1.5   | 1.3         | 1.3   | 1.2   |
| Dietary cholesterol (mg)                   | 221.1      | 283.0 | 361.2 | 179.5         | 242.6 | 302.5 | 219.3       | 302.3 | 387.3 |
| Glycemic load                              | 114.0      | 99.2  | 84.2  | 140.5         | 120.6 | 104.2 | 141.2       | 124.2 | 107.3 |
| Glycemic index                             | 54.8       | 53.5  | 51.2  | 55.1          | 54.0  | 52.3  | 54.0        | 53.4  | 51.9  |
| Total dietary fiber (g)                    | 16.9       | 16.4  | 15.8  | 19.6          | 18.1  | 17.4  | 22.6        | 20.7  | 19.4  |
| Cereal fiber (g)                           | 4.6        | 4.2   | 3.6   | 6.4           | 5.6   | 4.9   | 6.6         | 5.9   | 5.1   |
| Magnesium (mg)                             | 269.6      | 286.7 | 313.8 | 305.0         | 311.8 | 333.9 | 351.9       | 347.6 | 361.8 |

*(Table continues)*

|                            |       |       |       |       |        |        |       |       |       |
|----------------------------|-------|-------|-------|-------|--------|--------|-------|-------|-------|
| Heme iron (mg)             | 0.71  | 1.1   | 1.5   | 0.70  | 1.1    | 1.6    | 0.85  | 1.3   | 1.8   |
| Potassium (mg)             | 2661  | 2902  | 3152  | 2754  | 2927   | 3129   | 3240  | 3397  | 3614  |
| Calcium (mg)               | 754.6 | 873.7 | 1027  | 887.7 | 1015.5 | 1151.0 | 803.6 | 897.1 | 995.0 |
| Vitamin C (mg)             | 325.3 | 325.5 | 368.7 | 287.4 | 246.0  | 257.8  | 433.0 | 413.8 | 457.0 |
| Vitamin E (mg)             | 80.7  | 83.2  | 98.4  | 51.5  | 42.1   | 45.6   | 94.9  | 88.2  | 108.0 |
| Whole grains (serving/d)   | 1.3   | 1.2   | 1.0   | 1.6   | 1.4    | 1.1    | 1.9   | 1.6   | 1.3   |
| Fruit (serving/d)          | 1.5   | 1.4   | 1.4   | 1.3   | 1.2    | 1.1    | 2.6   | 2.3   | 2.0   |
| Vegetables (serving/d)     | 2.7   | 2.9   | 3.0   | 3.3   | 3.3    | 3.4    | 3.0   | 3.0   | 3.0   |
| Red meat (serving/d)       | 0.56  | 0.88  | 0.99  | 0.49  | 0.77   | 0.81   | 0.53  | 0.82  | 0.89  |
| Processed meat (serving/d) | 0.32  | 0.33  | 0.25  | 0.22  | 0.25   | 0.19   | 0.34  | 0.38  | 0.31  |
| Fish (serving/d)           | 0.10  | 0.16  | 0.27  | 0.19  | 0.27   | 0.40   | 0.26  | 0.39  | 0.61  |
| Chicken (serving/d)        | 0.20  | 0.29  | 0.45  | 0.39  | 0.67   | 1.0    | 0.34  | 0.55  | 0.85  |
| Egg (serving/d)            | 0.29  | 0.36  | 0.40  | 0.16  | 0.19   | 0.18   | 0.26  | 0.34  | 0.37  |
| Dairy (serving/d)          | 1.6   | 2.0   | 2.2   | 2.1   | 2.5    | 2.5    | 1.6   | 2.0   | 2.0   |
| Legumes (serving/d)        | 0.39  | 0.40  | 0.39  | 0.40  | 0.38   | 0.35   | 0.44  | 0.42  | 0.40  |
| Nuts (serving/d)           | 0.42  | 0.31  | 0.20  | 0.33  | 0.25   | 0.16   | 0.66  | 0.44  | 0.29  |
| Peanuts (serving/d)        | 0.17  | 0.11  | 0.07  | 0.05  | 0.04   | 0.02   | 0.23  | 0.15  | 0.09  |
| Peanut butter (serving/d)  | 0.26  | 0.20  | 0.13  | 0.24  | 0.19   | 0.12   | 0.31  | 0.21  | 0.13  |
| Potatoes (serving/d)       | 0.43  | 0.41  | 0.30  | 0.38  | 0.39   | 0.32   | 0.42  | 0.43  | 0.35  |
| Coffee (serving/d)         | 1.8   | 1.8   | 1.7   | 1.5   | 1.6    | 1.5    | 1.9   | 2.0   | 1.9   |
| SSB (serving/d)            | 0.58  | 0.26  | 0.11  | 0.89  | 0.42   | 0.18   | 0.55  | 0.32  | 0.18  |

Values are means unless otherwise specified.

<sup>a</sup> Not adjusted for age.

OC, oral contraceptive; MET-hr/wk, metabolic equivalent-hours per week; PMH, postmenopausal hormone; SSB, sugar-sweetened beverages.

**Web Table 3.** Age-adjusted characteristics according to baseline vegetable protein intake among 72,992 women in the NHS, 92,088 women in NHS II, and 40,722 men in the HPFS

|                                            | NHS (1984) |       |       | NHS II (1991) |       |       | HPFS (1986) |       |       |
|--------------------------------------------|------------|-------|-------|---------------|-------|-------|-------------|-------|-------|
|                                            | Q1         | Q3    | Q5    | Q1            | Q3    | Q5    | Q1          | Q3    | Q5    |
| Median intake (% energy/d)                 | 3.9        | 5.0   | 6.1   | 4.0           | 5.1   | 6.6   | 3.9         | 5.1   | 6.6   |
| No.                                        | 14598      | 14597 | 14599 | 18417         | 18416 | 18418 | 7921        | 7926  | 7921  |
| Age (y) <sup>a</sup>                       | 49.7       | 50.0  | 51.2  | 35.5          | 36.1  | 36.6  | 52.9        | 53.0  | 53.0  |
| White race/ethnicity (%)                   | 97.6       | 98.1  | 97.3  | 95.1          | 97.0  | 96.2  | 95.8        | 95.3  | 94.0  |
| BMI (weight (kg)/height (m) <sup>2</sup> ) | 25.0       | 25.0  | 24.5  | 25.2          | 24.7  | 23.7  | 25.9        | 25.5  | 24.8  |
| BMI >25 (%)                                | 37.6       | 38.4  | 34.3  | 38.2          | 34.8  | 27.5  | 58.8        | 54.4  | 42.1  |
| Physical activity (MET-hr/wk)              | 12.2       | 14.0  | 17.0  | 17.4          | 20.0  | 26.8  | 17.4        | 20.9  | 26.8  |
| Current smoker (%)                         | 34.1       | 22.6  | 17.5  | 17.8          | 11.2  | 8.9   | 16.4        | 8.4   | 5.1   |
| Hypertension (%)                           | 8.9        | 8.1   | 7.5   | 7.5           | 5.6   | 5.3   | 21.1        | 18.7  | 18.1  |
| High cholesterol (%)                       | 2.8        | 3.0   | 4.4   | 15.2          | 14.3  | 14.2  | 8.4         | 9.8   | 12.6  |
| Family history of diabetes (%)             | 27.7       | 28.5  | 28.6  | 35.1          | 35.0  | 33.0  | 17.7        | 19.5  | 18.1  |
| PMH use (%)                                | 23.1       | 24.2  | 25.6  | 5.1           | 4.1   | 4.4   | -           | -     | -     |
| OC use (%)                                 | -          | -     | -     | 11.2          | 11.0  | 10.1  | -           | -     | -     |
| Multivitamin use (%)                       | 34.6       | 36.0  | 42.2  | 40.9          | 43.6  | 47.3  | 37.6        | 40.6  | 48.4  |
| Alcohol (g)                                | 11.1       | 6.4   | 4.3   | 3.6           | 3.1   | 2.7   | 16.8        | 10.7  | 7.2   |
| Total energy (kcal)                        | 1743       | 1770  | 1694  | 1801          | 1807  | 1732  | 1988        | 1970  | 1897  |
| Carbohydrate (% energy)                    | 42.3       | 46.5  | 50.6  | 47.1          | 49.0  | 54.3  | 41.6        | 46.8  | 52.5  |
| Total fat (% energy)                       | 36.1       | 34.9  | 32.4  | 33.4          | 32.1  | 28.3  | 34.5        | 32.5  | 28.9  |
| Saturated fat (% energy)                   | 13.7       | 12.8  | 11.7  | 12.4          | 11.4  | 9.5   | 12.7        | 11.2  | 8.9   |
| Monounsaturated fat (% energy)             | 13.3       | 12.8  | 11.7  | 12.7          | 12.2  | 10.7  | 13.1        | 12.4  | 11.0  |
| Polyunsaturated fat (% energy)             | 6.2        | 6.7   | 6.9   | 5.4           | 5.7   | 5.7   | 5.5         | 6.0   | 6.3   |
| Trans fat (% energy)                       | 2.0        | 2.0   | 1.7   | 1.8           | 1.7   | 1.4   | 1.4         | 1.3   | 0.99  |
| Dietary cholesterol (mg)                   | 314.4      | 287.9 | 247.9 | 270.0         | 247.5 | 202.5 | 356.8       | 306.9 | 242.2 |
| Glycemic load                              | 88.7       | 99.5  | 108.9 | 114.9         | 119.2 | 133.1 | 108.8       | 124.0 | 139.8 |
| Glycemic index                             | 52.5       | 53.5  | 53.6  | 53.7          | 53.8  | 54.0  | 52.5        | 53.3  | 53.4  |
| Total dietary fiber (g)                    | 12.0       | 16.2  | 21.0  | 13.2          | 18.0  | 24.2  | 14.5        | 20.4  | 28.2  |
| Cereal fiber (g)                           | 2.6        | 4.1   | 5.8   | 3.5           | 5.5   | 8.0   | 3.6         | 5.8   | 8.5   |
| Magnesium (mg)                             | 256.8      | 281.0 | 336.2 | 273.1         | 311.7 | 368.0 | 301.1       | 343.7 | 423.0 |

*(Table continues)*

|                            |       |       |       |       |       |       |        |        |        |
|----------------------------|-------|-------|-------|-------|-------|-------|--------|--------|--------|
| Heme iron (mg)             | 1.3   | 1.1   | 0.89  | 1.3   | 1.2   | 0.90  | 1.6    | 1.4    | 1.0    |
| Potassium (mg)             | 2713  | 2888  | 3106  | 2686  | 2939  | 3170  | 3111.7 | 3392.5 | 3764.3 |
| Calcium (mg)               | 864.6 | 865.0 | 940.2 | 1020  | 1011  | 1037  | 895.6  | 874.9  | 955.6  |
| Vitamin C (mg)             | 294.8 | 316.1 | 421.4 | 214.4 | 240.0 | 328.4 | 339.6  | 410.4  | 564.1  |
| Vitamin E (mg)             | 75.3  | 77.5  | 112.9 | 37.1  | 40.1  | 59.8  | 74.0   | 87.9   | 132.0  |
| Whole grains (serving/d)   | 0.59  | 1.1   | 2.0   | 0.72  | 1.3   | 2.1   | 0.83   | 1.5    | 2.6    |
| Fruit (serving/d)          | 1.1   | 1.4   | 1.7   | 0.90  | 1.2   | 1.5   | 1.7    | 2.3    | 2.8    |
| Vegetables (serving/d)     | 2.2   | 2.8   | 3.6   | 2.3   | 3.2   | 4.4   | 2.2    | 3.0    | 3.9    |
| Red meat (serving/d)       | 1.0   | 0.85  | 0.58  | 0.93  | 0.74  | 0.43  | 1.1    | 0.79   | 0.43   |
| Processed meat (serving/d) | 0.37  | 0.32  | 0.21  | 0.30  | 0.24  | 0.13  | 0.51   | 0.37   | 0.18   |
| Fish (serving/d)           | 0.16  | 0.17  | 0.18  | 0.25  | 0.29  | 0.31  | 0.34   | 0.41   | 0.48   |
| Chicken (serving/d)        | 0.31  | 0.31  | 0.31  | 0.70  | 0.71  | 0.62  | 0.56   | 0.58   | 0.55   |
| Egg (serving/d)            | 0.38  | 0.36  | 0.30  | 0.20  | 0.20  | 0.15  | 0.43   | 0.34   | 0.23   |
| Dairy (serving/d)          | 2.3   | 2.0   | 1.6   | 2.9   | 2.5   | 1.9   | 2.4    | 1.9    | 1.5    |
| Legumes (serving/d)        | 0.29  | 0.39  | 0.53  | 0.25  | 0.35  | 0.56  | 0.29   | 0.40   | 0.61   |
| Nuts (serving/d)           | 0.14  | 0.27  | 0.57  | 0.14  | 0.24  | 0.38  | 0.22   | 0.41   | 0.82   |
| Peanuts (serving/d)        | 0.05  | 0.10  | 0.23  | 0.02  | 0.04  | 0.05  | 0.07   | 0.13   | 0.29   |
| Peanut butter (serving/d)  | 0.09  | 0.17  | 0.35  | 0.10  | 0.18  | 0.28  | 0.10   | 0.20   | 0.39   |
| Potatoes (serving/d)       | 0.35  | 0.40  | 0.38  | 0.36  | 0.38  | 0.34  | 0.40   | 0.42   | 0.39   |
| Coffee (serving/d)         | 2.0   | 1.8   | 1.5   | 1.3   | 1.6   | 1.7   | 2.0    | 2.0    | 1.7    |
| SSB (serving/d)            | 0.60  | 0.27  | 0.14  | 1.0   | 0.36  | 0.17  | 0.61   | 0.30   | 0.15   |

Values are means unless otherwise specified.

<sup>a</sup> Not adjusted for age.

OC, oral contraceptive; MET-hr/wk, metabolic equivalent-hours per week; PMH, postmenopausal hormone; SSB, sugar-sweetened beverages.

**Web Table 4.** Hazard ratios (HR) and 95% confidence intervals (95% CI) for the association between total protein intake and risk of type 2 diabetes in the Nurses' Health Study, Nurses' Health Study II, and the Health Professionals Follow-up Study, adjusting for red and processed meat, heme iron, and branched chain and aromatic amino acids

|                          | Q1   | Q2                | Q3                | Q4                | Q5                | P-Trend |
|--------------------------|------|-------------------|-------------------|-------------------|-------------------|---------|
| <b>NHS</b>               |      |                   |                   |                   |                   |         |
| + red and processed meat | 1.00 | 1.02 (0.94, 1.11) | 1.13 (1.04, 1.22) | 1.24 (1.14, 1.34) | 1.33 (1.22, 1.46) | <0.001  |
| + BMI                    | 1.00 | 0.98 (0.90, 1.06) | 1.03 (0.95, 1.12) | 1.06 (0.98, 1.16) | 1.03 (0.94, 1.13) | 0.28    |
| + heme iron              | 1.00 | 0.99 (0.92, 1.08) | 1.07 (0.99, 1.17) | 1.16 (1.06, 1.27) | 1.22 (1.10, 1.35) | <0.001  |
| + BMI                    | 1.00 | 0.96 (0.88, 1.04) | 0.99 (0.91, 1.08) | 1.01 (0.92, 1.10) | 0.95 (0.86, 1.05) | 0.56    |
| + BCAA                   | 1.00 | 1.03 (0.91, 1.16) | 1.18 (1.02, 1.37) | 1.27 (1.06, 1.51) | 1.28 (1.04, 1.58) | 0.03    |
| + BMI                    | 1.00 | 0.98 (0.87, 1.11) | 1.08 (0.93, 1.26) | 1.10 (0.92, 1.32) | 1.02 (0.83, 1.25) | 0.88    |
| + AAA                    | 1.00 | 1.01 (0.90, 1.14) | 1.13 (0.98, 1.31) | 1.21 (1.02, 1.43) | 1.26 (1.03, 1.53) | 0.03    |
| + BMI                    | 1.00 | 0.96 (0.86, 1.09) | 1.04 (0.90, 1.20) | 1.05 (0.88, 1.24) | 0.99 (0.81, 1.21) | 0.82    |
| <b>NHS II</b>            |      |                   |                   |                   |                   |         |
| + red and processed meat | 1.00 | 0.97 (0.87, 1.07) | 1.03 (0.93, 1.15) | 1.13 (1.02, 1.26) | 1.36 (1.22, 1.53) | <0.001  |
| + BMI                    | 1.00 | 0.91 (0.83, 1.01) | 0.90 (0.81, 1.00) | 0.94 (0.85, 1.05) | 1.00 (0.89, 1.12) | 0.52    |
| + heme iron              | 1.00 | 0.91 (0.82, 1.00) | 0.93 (0.84, 1.04) | 0.99 (0.89, 1.11) | 1.15 (1.02, 1.31) | 0.002   |
| + BMI                    | 1.00 | 0.89 (0.80, 0.98) | 0.86 (0.77, 0.96) | 0.89 (0.79, 1.00) | 0.93 (0.82, 1.06) | 0.63    |
| + BCAA                   | 1.00 | 0.99 (0.85, 1.16) | 1.02 (0.84, 1.24) | 1.06 (0.84, 1.33) | 1.27 (1.19, 1.36) | 0.02    |
| + BMI                    | 1.00 | 0.95 (0.81, 1.10) | 0.89 (0.74, 1.08) | 0.89 (0.71, 1.12) | 0.97 (0.75, 1.26) | 0.85    |
| + AAA                    | 1.00 | 1.03 (0.88, 1.19) | 1.00 (0.82, 1.21) | 1.02 (0.81, 1.27) | 1.18 (0.92, 1.53) | 0.08    |
| + BMI                    | 1.00 | 1.01 (0.87, 1.17) | 0.94 (0.78, 1.13) | 0.96 (0.77, 1.19) | 1.05 (0.81, 1.36) | 0.47    |
| <b>HPFS</b>              |      |                   |                   |                   |                   |         |
| + red and processed meat | 1.00 | 0.86 (0.77, 0.97) | 0.92 (0.81, 1.03) | 0.98 (0.87, 1.11) | 1.29 (1.13, 1.47) | <0.001  |
| + BMI                    | 1.00 | 0.84 (0.74, 0.94) | 0.87 (0.77, 0.98) | 0.90 (0.80, 1.02) | 1.13 (1.00, 1.29) | 0.004   |
| + heme iron              | 1.00 | 0.83 (0.73, 0.93) | 0.85 (0.75, 0.96) | 0.89 (0.78, 1.02) | 1.14 (0.98, 1.31) | 0.01    |
| + BMI                    | 1.00 | 0.81 (0.72, 0.91) | 0.83 (0.73, 0.94) | 0.85 (0.74, 0.97) | 1.05 (0.91, 1.21) | 0.13    |
| + BCAA                   | 1.00 | 0.80 (0.67, 0.96) | 0.81 (0.65, 1.01) | 0.84 (0.64, 1.09) | 1.06 (0.78, 1.45) | 0.18    |
| + BMI                    | 1.00 | 0.77 (0.65, 0.92) | 0.76 (0.61, 0.95) | 0.74 (0.57, 0.98) | 0.91 (0.67, 1.24) | 0.74    |
| + AAA                    | 1.00 | 0.87 (0.73, 1.03) | 0.95 (0.76, 1.18) | 1.04 (0.80, 1.34) | 1.40 (1.03, 1.89) | 0.002   |
| + BMI                    | 1.00 | 0.84 (0.70, 1.00) | 0.90 (0.72, 1.12) | 0.94 (0.73, 1.22) | 1.23 (0.91, 1.67) | 0.03    |

(Table continues)

**Pooled results**

|                          |      |                   |                    |                   |                   |        |
|--------------------------|------|-------------------|--------------------|-------------------|-------------------|--------|
| + red and processed meat | 1.00 | 0.97 (0.92, 1.02) | 1.05 (0.99, 1.11)  | 1.14 (1.08, 1.21) | 1.33 (1.25, 1.41) | <0.001 |
| + BMI                    | 1.00 | 0.92 (0.87, 0.98) | 0.95 (0.90, 1.01)  | 0.99 (0.93, 1.05) | 1.04 (0.98, 1.11) | 0.01   |
| + heme iron              | 1.00 | 0.93 (0.88, 0.98) | 0.98 (0.92, 1.04)  | 1.04 (0.98, 1.11) | 1.18 (1.10, 1.26) | <0.001 |
| + BMI                    | 1.00 | 0.90 (0.85, 0.95) | 0.91 (0.86, 0.970) | 0.93 (0.88, 0.99) | 0.97 (0.90, 1.04) | 0.95   |
| + BCAA                   | 1.00 | 0.96 (0.89, 1.05) | 1.04 (0.94, 1.16)  | 1.10 (0.97, 1.24) | 1.23 (1.06, 1.42) | 0.001  |
| + BMI                    | 1.00 | 0.92 (0.85, 1.00) | 0.95 (0.85, 1.05)  | 0.95 (0.84, 1.07) | 0.98 (0.85, 1.13) | 0.87   |
| + AAA                    | 1.00 | 0.98 (0.90, 1.06) | 1.05 (0.95, 1.16)  | 1.11 (0.98, 1.25) | 1.26 (1.10, 1.45) | <0.001 |
| + BMI                    | 1.00 | 0.95 (0.87, 1.03) | 0.98 (0.88, 1.08)  | 1.00 (0.88, 1.12) | 1.06 (0.92, 1.22) | 0.19   |

Adjusted for family history of diabetes, smoking, alcohol intake, physical activity, ethnicity, total energy intake, postmenopausal hormone use (NHS, NHS II), oral contraceptive use (NHS II), percentage of energy from *trans*- fat, saturated fat, monounsaturated fat, polyunsaturated fat, dietary cholesterol, dietary fiber, and glycemic index.

BMI, body mass index; BCAA, branched chain amino acids; AAA, aromatic amino acids.



**Web Figure 2.** Pooled hazard ratios (HR) and 95% confidence intervals (95% CI) for the association between replacement of 1 serving of individual animal protein foods (dairy, poultry, egg, red meat, processed meat), refined grains, and potatoes with 1 serving of peanuts and peanut butter (A) and 1 serving of whole grains (B) in the NHS, NHS II, and HPFS. Models adjusted for age, family history of diabetes, smoking, alcohol intake, physical activity, ethnicity, total energy intake, postmenopausal hormone use (NHS, NHS II), oral contraceptive use (NHS II), intakes of sugar-sweetened beverages, fruit, vegetables, and BMI. Results were mutually adjusted for other food sources of animal protein, refined grains, and potatoes.

*[Graph appears on next page.]*

A)

Type of Food Replaced

HR (95% CI)

Dairy  
 Refined grains  
 Poultry  
 Eggs  
 Red meat  
 Fish  
 Potatoes  
 Processed meat

0.98 (0.93, 1.03)  
 0.93 (0.88, 0.99)  
 0.91 (0.84, 0.98)  
 0.89 (0.82, 0.97)  
 0.89 (0.84, 0.95)  
 0.88 (0.81, 0.97)  
 0.84 (0.77, 0.91)  
 0.79 (0.73, 0.85)

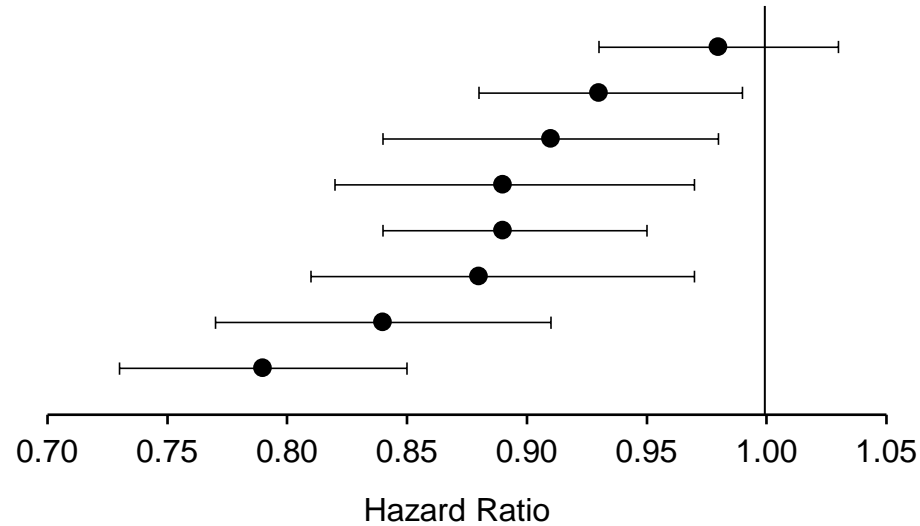

B)

Type of Food Replaced

HR (95% CI)

Dairy  
 Refined grains  
 Poultry  
 Eggs  
 Red meat  
 Fish  
 Potatoes  
 Processed meat

0.97 (0.95, 1.00)  
 0.93 (0.90, 0.95)  
 0.89 (0.84, 0.94)  
 0.88 (0.83, 0.94)  
 0.88 (0.85, 0.92)  
 0.85 (0.79, 0.92)  
 0.83 (0.77, 0.90)  
 0.78 (0.74, 0.83)

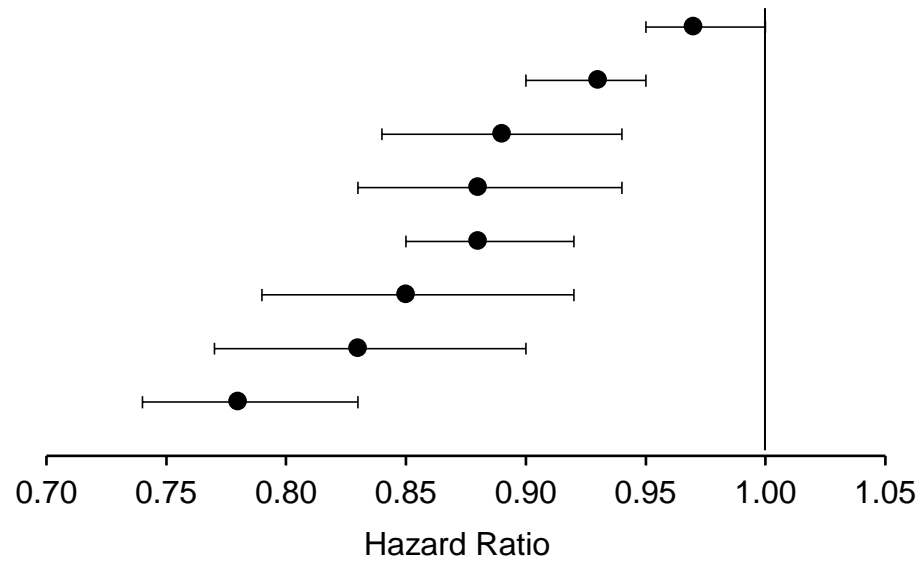

**Web Table 5.** Pooled associations between total protein, animal protein, and vegetable protein and risk of type 2 diabetes, stratified by weight status, age, physical activity, Alternate Healthy Eating Index score, and family history of diabetes in the Nurses' Health Study, Nurses' Health Study II, and the Health Professionals Follow-up Study

|                          | Q1  | Q2                | Q3                | Q4                | Q5                | P-Trend |
|--------------------------|-----|-------------------|-------------------|-------------------|-------------------|---------|
| <b>Weight status</b>     |     |                   |                   |                   |                   |         |
| <b>BMI &lt;30</b>        |     |                   |                   |                   |                   |         |
| Total protein            |     |                   |                   |                   |                   |         |
| HR (95% CI)              | 1.0 | 0.99 (0.91, 1.07) | 1.04 (0.96, 1.13) | 1.09 (1.01, 1.19) | 1.23 (1.12, 1.35) | <0.001  |
| Animal protein           |     |                   |                   |                   |                   |         |
| HR (95% CI)              | 1.0 | 1.08 (1.00, 1.17) | 1.10 (1.01, 1.20) | 1.19 (1.09, 1.30) | 1.31 (1.19, 1.45) | <0.001  |
| Vegetable protein        |     |                   |                   |                   |                   |         |
| HR (95% CI)              | 1.0 | 0.99 (0.91, 1.07) | 0.93 (0.86, 1.02) | 0.94 (0.86, 1.03) | 0.93 (0.84, 1.04) | 0.24    |
| <b>BMI ≥30</b>           |     |                   |                   |                   |                   |         |
| Total protein            |     |                   |                   |                   |                   |         |
| HR (95% CI)              | 1.0 | 0.91 (0.84, 0.98) | 0.93 (0.86, 1.00) | 0.97 (0.90, 1.06) | 1.01 (0.93, 1.10) | 0.14    |
| Animal protein           |     |                   |                   |                   |                   |         |
| HR (95% CI)              | 1.0 | 0.94 (0.87, 1.02) | 0.95 (0.88, 1.04) | 0.99 (0.91, 1.08) | 1.07 (0.98, 1.17) | 0.01    |
| Vegetable protein        |     |                   |                   |                   |                   |         |
| HR (95% CI)              | 1.0 | 0.97 (0.92, 1.03) | 0.92 (0.86, 0.98) | 0.92 (0.86, 0.98) | 0.95 (0.89, 1.02) | 0.85    |
| <b>Age<sup>a</sup></b>   |     |                   |                   |                   |                   |         |
| <b>Younger</b>           |     |                   |                   |                   |                   |         |
| Total protein            |     |                   |                   |                   |                   |         |
| HR (95% CI)              | 1.0 | 0.94 (0.85, 1.05) | 0.99 (0.89, 1.10) | 1.04 (0.94, 1.16) | 0.99 (0.88, 1.11) | 0.58    |
| Animal protein           |     |                   |                   |                   |                   |         |
| HR (95% CI)              | 1.0 | 1.03 (0.93, 1.15) | 0.98 (0.87, 1.09) | 1.09 (0.98, 1.23) | 1.08 (0.95, 1.22) | 0.09    |
| Vegetable protein        |     |                   |                   |                   |                   |         |
| HR (95% CI)              | 1.0 | 0.95 (0.86, 1.04) | 0.91 (0.82, 1.01) | 0.90 (0.80, 1.01) | 0.89 (0.78, 1.02) | 0.17    |
| <b>Older</b>             |     |                   |                   |                   |                   |         |
| Total protein            |     |                   |                   |                   |                   |         |
| HR (95% CI)              | 1.0 | 0.94 (0.88, 1.00) | 0.95 (0.89, 1.02) | 0.98 (0.92, 1.05) | 1.08 (1.00, 1.16) | 0.004   |
| Animal protein           |     |                   |                   |                   |                   |         |
| HR (95% CI)              | 1.0 | 0.98 (0.92, 1.05) | 1.01 (0.94, 1.08) | 1.03 (0.95, 1.10) | 1.14 (1.05, 1.23) | <0.001  |
| Vegetable protein        |     |                   |                   |                   |                   |         |
| HR (95% CI)              | 1.0 | 1.00 (0.94, 1.07) | 0.94 (0.88, 1.00) | 0.96 (0.90, 1.03) | 0.99 (0.92, 1.06) | 0.88    |
| <i>(Table continues)</i> |     |                   |                   |                   |                   |         |

| <b>Physical activity<sup>b</sup></b> |     |                   |                          |                   |                   |        |  |
|--------------------------------------|-----|-------------------|--------------------------|-------------------|-------------------|--------|--|
|                                      |     |                   | <b>Less Active</b>       |                   |                   |        |  |
| Total protein                        |     |                   |                          |                   |                   |        |  |
| HR (95% CI)                          | 1.0 | 0.94 (0.88, 1.01) | 0.95 (0.89, 1.02)        | 1.01 (0.94, 1.09) | 1.01 (0.94, 1.09) | 0.19   |  |
| Animal protein                       |     |                   |                          |                   |                   |        |  |
| HR (95% CI)                          | 1.0 | 1.00 (0.94, 1.08) | 0.99 (0.92, 1.07)        | 1.04 (0.96, 1.12) | 1.11 (1.03, 1.21) | 0.001  |  |
| Vegetable protein                    |     |                   |                          |                   |                   |        |  |
| HR (95% CI)                          | 1.0 | 0.96 (0.91, 1.02) | 0.93 (0.87, 0.99)        | 0.93 (0.87, 1.00) | 0.93 (0.86, 1.01) | 0.20   |  |
|                                      |     |                   | <b>More Active</b>       |                   |                   |        |  |
| Total protein                        |     |                   |                          |                   |                   |        |  |
| HR (95% CI)                          | 1.0 | 0.91 (0.82, 1.01) | 0.97 (0.88, 1.08)        | 0.97 (0.88, 1.08) | 1.13 (1.01, 1.26) | 0.003  |  |
| Animal protein                       |     |                   |                          |                   |                   |        |  |
| HR (95% CI)                          | 1.0 | 0.96 (0.86, 1.06) | 1.00 (0.90, 1.11)        | 1.04 (0.94, 1.16) | 1.12 (1.00, 1.26) | 0.01   |  |
| Vegetable protein                    |     |                   |                          |                   |                   |        |  |
| HR (95% CI)                          | 1.0 | 1.02 (0.93, 1.12) | 0.92 (0.84, 1.02)        | 0.97 (0.87, 1.07) | 1.02 (0.92, 1.14) | 0.54   |  |
| <b>AHEI score<sup>b</sup></b>        |     |                   |                          |                   |                   |        |  |
|                                      |     |                   | <b>Lower AHEI Score</b>  |                   |                   |        |  |
| Total protein                        |     |                   |                          |                   |                   |        |  |
| HR (95% CI)                          | 1.0 | 0.94 (0.88, 1.00) | 0.97 (0.91, 1.04)        | 1.01 (0.94, 1.08) | 1.08 (0.99, 1.17) | 0.02   |  |
| Animal protein                       |     |                   |                          |                   |                   |        |  |
| HR (95% CI)                          | 1.0 | 1.00 (0.93, 1.07) | 0.98 (0.91, 1.06)        | 1.08 (1.00, 1.16) | 1.15 (1.05, 1.25) | <0.001 |  |
| Vegetable protein                    |     |                   |                          |                   |                   |        |  |
| HR (95% CI)                          | 1.0 | 0.98 (0.92, 1.03) | 0.90 (0.85, 0.96)        | 0.94 (0.88, 1.00) | 0.96 (0.89, 1.04) | 0.53   |  |
|                                      |     |                   | <b>Higher AHEI Score</b> |                   |                   |        |  |
| Total protein                        |     |                   |                          |                   |                   |        |  |
| HR (95% CI)                          | 1.0 | 0.95 (0.86, 1.06) | 0.98 (0.88, 1.09)        | 1.04 (0.93, 1.15) | 1.10 (0.98, 1.22) | 0.01   |  |
| Animal protein                       |     |                   |                          |                   |                   |        |  |
| HR (95% CI)                          | 1.0 | 1.00 (0.91, 1.10) | 1.05 (0.95, 1.16)        | 1.04 (0.94, 1.15) | 1.15 (1.03, 1.28) | 0.003  |  |
| Vegetable protein                    |     |                   |                          |                   |                   |        |  |
| HR (95% CI)                          | 1.0 | 1.03 (0.92, 1.14) | 1.00 (0.90, 1.11)        | 0.98 (0.88, 1.09) | 1.03 (0.92, 1.14) | 0.63   |  |
| <b>Family history of diabetes</b>    |     |                   |                          |                   |                   |        |  |
|                                      |     |                   | <b>No</b>                |                   |                   |        |  |
| Total protein                        |     |                   |                          |                   |                   |        |  |
| HR (95% CI)                          | 1.0 | 0.94 (0.87, 1.02) | 0.98 (0.91, 1.06)        | 1.01 (0.94, 1.10) | 1.04 (0.96, 1.14) | 0.09   |  |

*(Table continues)*

| <b>Family history of diabetes</b> ( <i>continued</i> ) |                                |                   |                   |                   |                   |       |
|--------------------------------------------------------|--------------------------------|-------------------|-------------------|-------------------|-------------------|-------|
|                                                        | <b>No</b> ( <i>continued</i> ) |                   |                   |                   |                   |       |
|                                                        | <b>Yes</b>                     |                   |                   | <b>No</b>         |                   |       |
| Animal protein<br>HR (95% CI)                          | 1.0                            | 0.98 (0.92, 1.05) | 0.99 (0.92, 1.06) | 1.02 (0.95, 1.10) | 1.09 (1.01, 1.18) | 0.004 |
| Vegetable protein<br>HR (95% CI)                       | 1.0                            | 0.98 (0.91, 1.05) | 0.94 (0.87, 1.02) | 0.93 (0.85, 1.01) | 0.99 (0.90, 1.09) | 0.86  |
| Total protein<br>HR (95% CI)                           | 1.0                            | 0.93 (0.86, 1.00) | 0.94 (0.87, 1.01) | 0.99 (0.92, 1.07) | 1.06 (0.98, 1.15) | 0.03  |
| Animal protein<br>HR (95% CI)                          | 1.0                            | 1.01 (0.93, 1.08) | 0.98 (0.91, 1.06) | 1.06 (0.98, 1.14) | 1.13 (1.04, 1.23) | 0.002 |
| Vegetable protein<br>HR (95% CI)                       | 1.0                            | 0.98 (0.91, 1.05) | 0.90 (0.84, 0.98) | 0.95 (0.88, 1.04) | 0.94 (0.86, 1.03) | 0.46  |

Adjusted for: age, family history of diabetes, smoking, alcohol intake, physical activity, ethnicity, total energy intake, postmenopausal hormone use (NHS, NHS II), oral contraceptive use (NHS II), percentage of energy from *trans*- fat, saturated fat, monounsaturated fat, polyunsaturated fat, dietary cholesterol, dietary fiber, glycemic index, mutual adjustment for percentage of energy from animal and vegetable protein and BMI.

AHEI, alternate healthy eating index; BMI, body mass index; CI, confidence interval; HR, hazard ratio; NHS, Nurses' Health Study; NHS II, Nurses' Health Study II; HPFS, Health Professionals Follow-up Study.

*P*-interaction (total protein, animal protein, vegetable protein): age (0.96, 0.43, 0.72); BMI (<0.0001, <0.0001, 0.24); physical activity (0.30, 0.94, 0.61); AHEI (0.41, 0.66, 0.55); family history of diabetes (0.74, 0.95, 0.80).

<sup>a</sup> Age was dichotomized as <60 years or ≥60 years in the NHS, <40 years or ≥40 years in NHS II, and <65 years or ≥65 years in the HPFS, based on the different age distributions of the individual cohorts.

<sup>b</sup> Physical activity and AHEI are dichotomized according to cohort-specific medians.
